# Supplementary material for: Development of microsatellite markers for population genetics of biting midges and a potential tool for species identification of Culicoides sonorensis Wirth & Jones
Source: PubMed Central journal article supplement (PMC8889724; doi:10.1186/s13071-022-05189-8), 2022-03-02

# Overall 21 markers

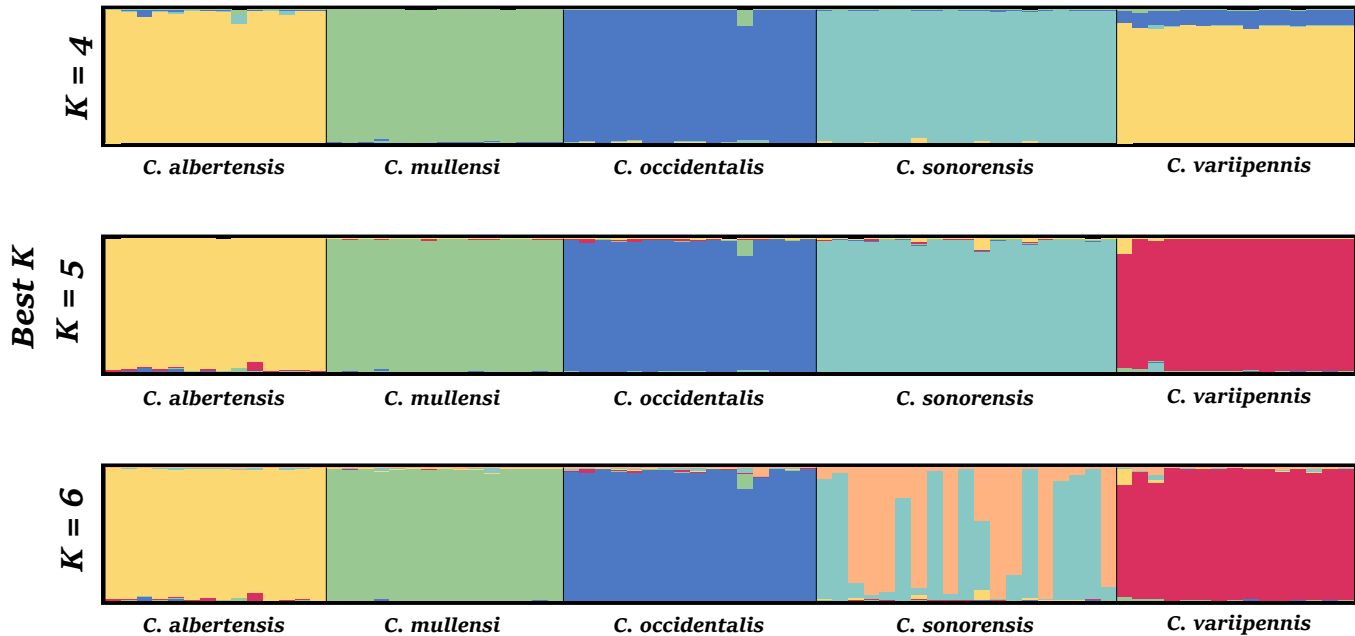

Supplement: 13071_2022_5189_MOESM1_ESM.pdf [file 13071_2022_5189_MOESM1_ESM.pdf]
