# Supplementary material for: Development of microsatellite markers for population genetics of biting midges and a potential tool for species identification of Culicoides sonorensis Wirth & Jones
Source: PubMed Central journal article supplement (PMC8889724; doi:10.1186/s13071-022-05189-8), 2022-03-02

**Microsatellite markers**

**4-marker subset**

**7-marker subset**

- C226
- C728
- C838
- C1450
- C589
- C2085
- C1241
- C244
- C47
- C230
- C94
- C1253
- C43
- C1296
- C927
- C45
- C65
- C54

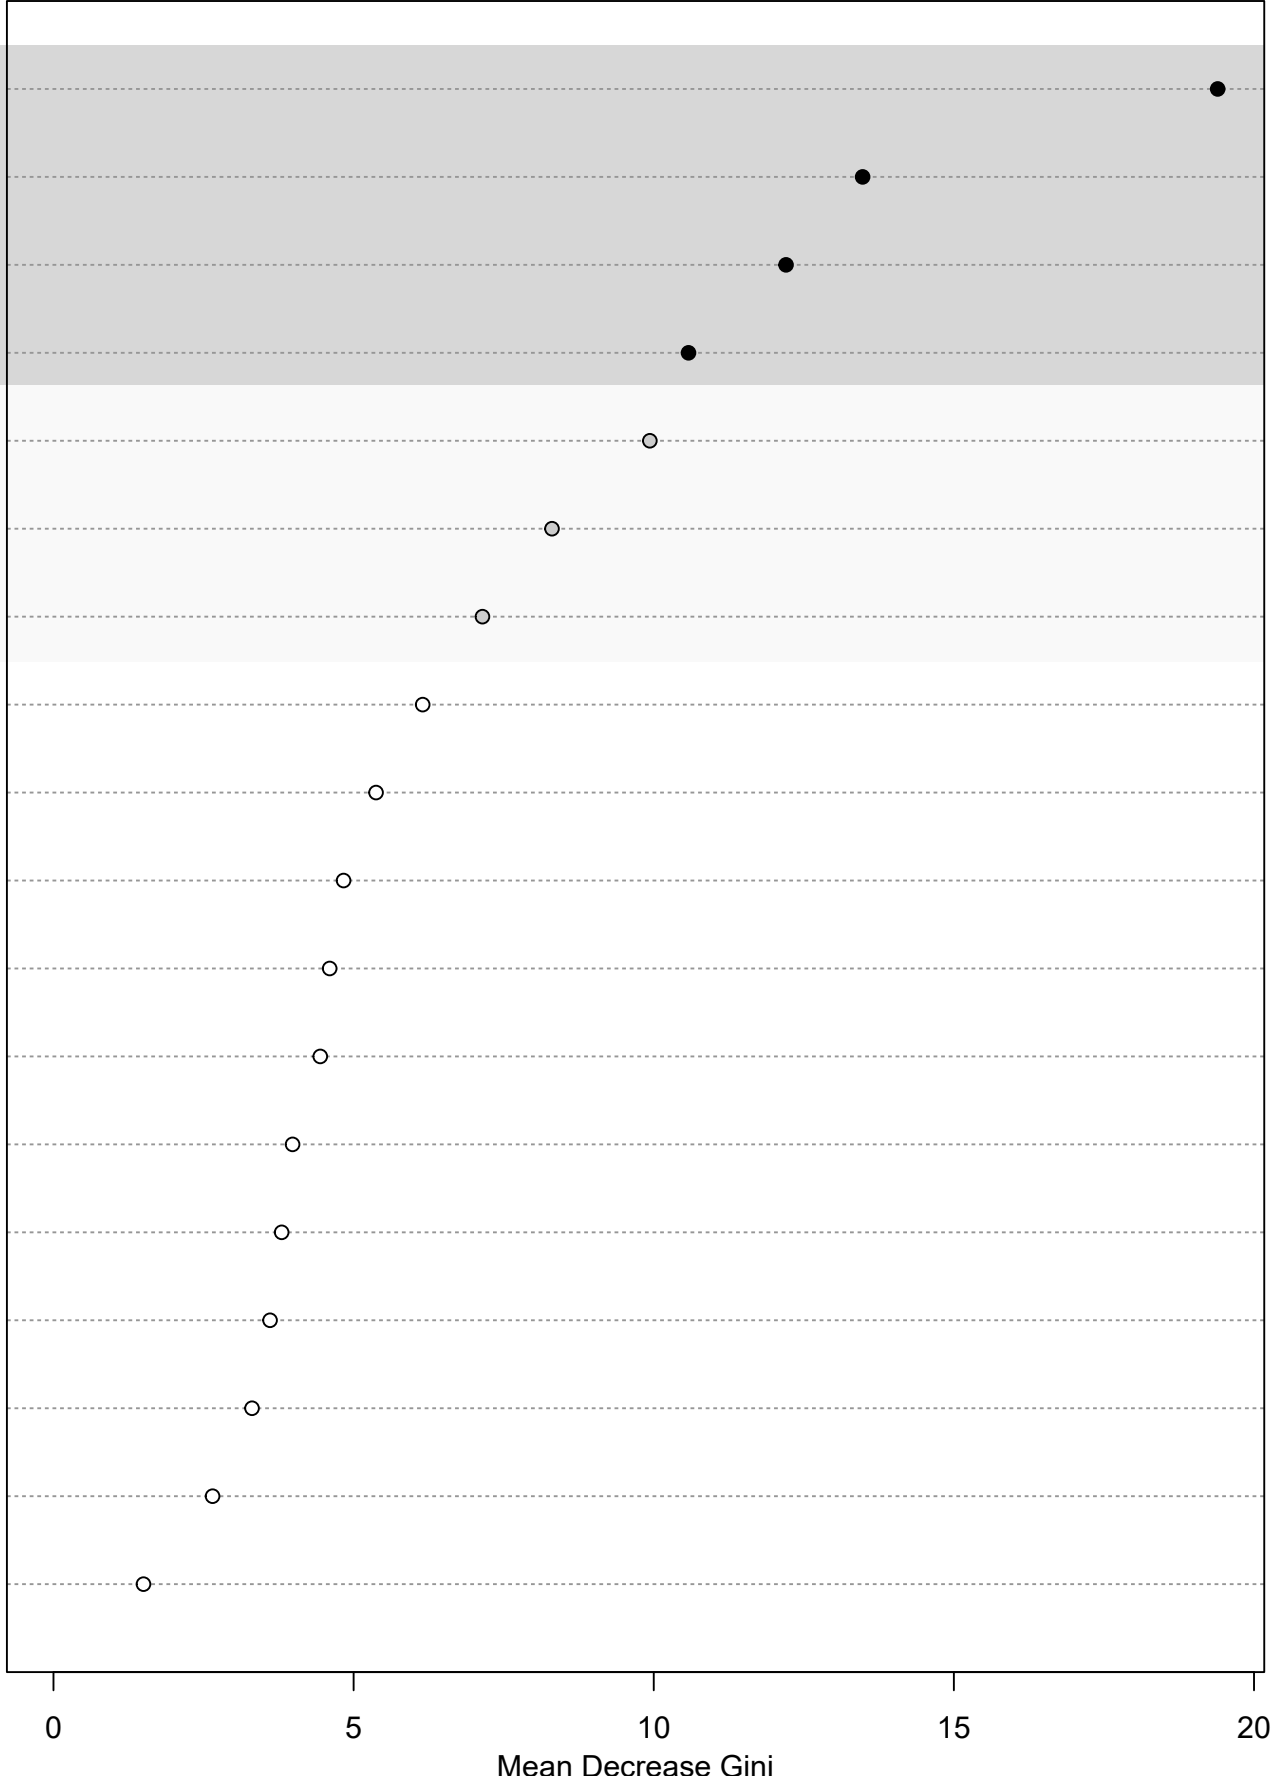

Supplement: 13071_2022_5189_MOESM2_ESM.pdf [file 13071_2022_5189_MOESM2_ESM.pdf]
