# Supplementary material for: Development of microsatellite markers for population genetics of biting midges and a potential tool for species identification of Culicoides sonorensis Wirth & Jones
Source: PubMed Central journal article supplement (PMC8889724; doi:10.1186/s13071-022-05189-8), 2022-03-02
Supplement: 13071_2022_5189_MOESM3_ESM.pdf [file 13071_2022_5189_MOESM3_ESM.pdf]

## 18 markers

OOB estimate of error rate: 1.27%

|                                                                                 |  |  |  |  |  | <b>Error</b> |
|---------------------------------------------------------------------------------|----------------------------------------------------------------------------------|-----------------------------------------------------------------------------------|-----------------------------------------------------------------------------------|-----------------------------------------------------------------------------------|-----------------------------------------------------------------------------------|--------------|
|  | 28                                                                               | 0                                                                                 | 0                                                                                 | 0                                                                                 | 0                                                                                 | 0.000        |
|  | 0                                                                                | 30                                                                                | 0                                                                                 | 0                                                                                 | 0                                                                                 | 0.000        |
|  | 0                                                                                | 0                                                                                 | 32                                                                                | 0                                                                                 | 0                                                                                 | 0.000        |
|  | 1                                                                                | 0                                                                                 | 0                                                                                 | 37                                                                                | 0                                                                                 | 0.026        |
|  | 1                                                                                | 0                                                                                 | 0                                                                                 | 0                                                                                 | 29                                                                                | 0.033        |

## 7 markers

OOB estimate of error rate: 1.90%

|                                                                                   |  |  |  |  |  | <b>Error</b> |
|-----------------------------------------------------------------------------------|------------------------------------------------------------------------------------|-------------------------------------------------------------------------------------|-------------------------------------------------------------------------------------|-------------------------------------------------------------------------------------|-------------------------------------------------------------------------------------|--------------|
|  | 28                                                                                 | 0                                                                                   | 0                                                                                   | 0                                                                                   | 0                                                                                   | 0.000        |
|  | 0                                                                                  | 30                                                                                  | 1                                                                                   | 0                                                                                   | 0                                                                                   | 0.033        |
|  | 0                                                                                  | 0                                                                                   | 32                                                                                  | 0                                                                                   | 0                                                                                   | 0.000        |
|  | 1                                                                                  | 0                                                                                   | 0                                                                                   | 37                                                                                  | 0                                                                                   | 0.026        |
|  | 1                                                                                  | 0                                                                                   | 0                                                                                   | 0                                                                                   | 29                                                                                  | 0.033        |

## 4 markers

OOB estimate of error rate: 6.33%

|                                                                                     |  |  |  |  |  | <b>Error</b> |
|-------------------------------------------------------------------------------------|-------------------------------------------------------------------------------------|-------------------------------------------------------------------------------------|-------------------------------------------------------------------------------------|-------------------------------------------------------------------------------------|-------------------------------------------------------------------------------------|--------------|
|  | 28                                                                                  | 0                                                                                   | 0                                                                                   | 0                                                                                   | 0                                                                                   | 0.000        |
|  | 0                                                                                   | 26                                                                                  | 1                                                                                   | 2                                                                                   | 1                                                                                   | 0.133        |
|  | 0                                                                                   | 0                                                                                   | 32                                                                                  | 0                                                                                   | 0                                                                                   | 0.000        |
|  | 1                                                                                   | 1                                                                                   | 0                                                                                   | 36                                                                                  | 0                                                                                   | 0.053        |
|  | 2                                                                                   | 0                                                                                   | 2                                                                                   | 0                                                                                   | 26                                                                                  | 0.133        |

 *C. albertensis*

 *C. mullensi*

 *C. occidentalis*

 *C. sonorensis*

 *C. variipennis*
